# Supplementary material for: The PrpF protein of Shewanella oneidensis MR-1 catalyzes the isomerization of 2-methyl-cis-aconitate during the catabolism of propionate via the AcnD-dependent 2-methylcitric acid cycle
Source: PLOS journal article supplement (doi:10.1371/journal.pone.0188130), 2017-11-16

The PrpF protein of *Shewanella oneidensis* MR-1 catalyzes the isomerization of 2-methyl-*cis*-aconitate during the catabolism of propionate via the AcnD-dependent 2-methylcitric acid cycle

Christopher J. Rocco<sup>1,#a</sup>, Karl M. Wetterhorn<sup>2</sup>, Graeme S. Garvey<sup>2,#b</sup>, Ivan Rayment<sup>2</sup>, and Jorge C. Escalante-Semerena<sup>5\*</sup>

<sup>1</sup>Department of Bacteriology<sup>1</sup>, University of Wisconsin, Madison, WI 53706 USA

<sup>2</sup>Department of Biochemistry, University of Wisconsin, Madison, WI 53706 USA

<sup>3</sup>Department of Microbiology, University of Georgia, Athens, GA 30602 USA

<sup>#a</sup>Present Address: Center for Microbial Pathogenesis, The Research Institute at Nationwide Children's Hospital, Columbus, OH 43210

<sup>#b</sup>Present address: Monsanto Vegetable Seeds, Woodland, CA 95695

Running title: PrpF is a 2-methyl-*cis*-aconitate isomerase

\*Corresponding author E-mail: [jcescala@uga.edu](mailto:jcescala@uga.edu)

**Figure S1.** Kinetics of aconitase product formation. Reaction mixtures contained aconitase A (AcnA) and aconitase B (AcnB) with *cis*-aconitate (Panel A: AcnA; Panel B: AcnB) or 2-methyl-*cis*-aconitate (Panel C: AcnA; Panel D: AcnB) as substrate. Product formation (either isocitrate from *cis*-aconitate; 2-methylisocitrate from 2-methyl-*cis*-aconitate) was monitored as a decrease in absorbance at 240 nm over time (min; y-axes) as a function of substrate concentration ( $\mu\text{M}$ ; x axes). The increase in the rate at which  $A_{240}$  decreased is what is plotted. Detailed assay conditions are described under Materials and Methods.

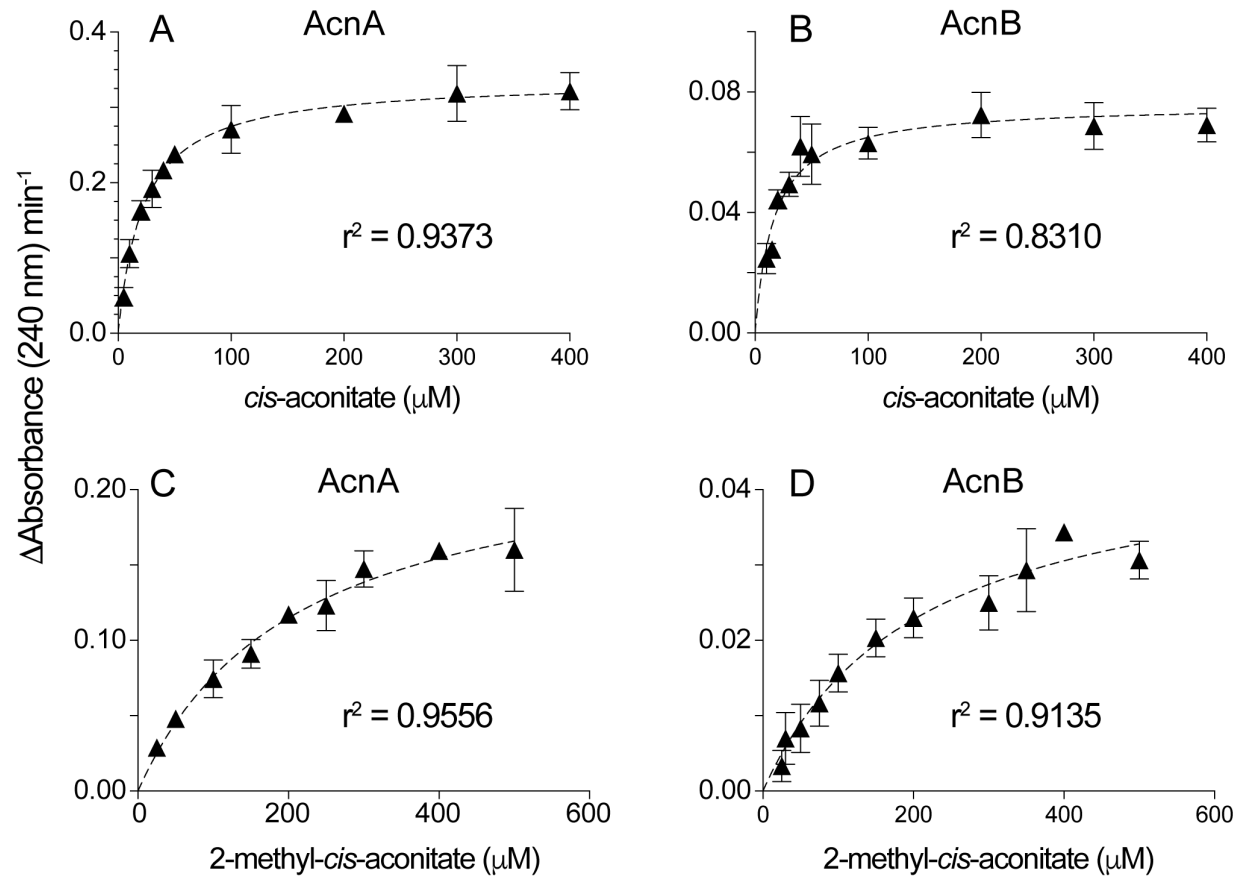

Supplement: S1 (10.1371/journal.pone.0188130.s001) [file journal.pone.0188130.s001]
